# Supplementary material for: Microwave Irradiation and Glutamic Acid-Assisted Phytotreatment of Tannery and Surgical Industrial Wastewater by Sorghum
Source: MDPI journal article supplement (doi:10.3390/molecules27134004), 2022-06-22
Supplement: s1 [file s1]

Supplementary Table S1: Experimental Treatments

| Treatments            | Conc. levels               | Treatments      | Conc. levels               | Treatments      | Conc. levels                 |
|-----------------------|----------------------------|-----------------|----------------------------|-----------------|------------------------------|
| <b>T<sub>1</sub></b>  | Ck                         | T <sub>11</sub> | WW 25%+ MR 30s+ GA<br>5mM  | T <sub>21</sub> | WW 75%+ MR 0s +GA<br>5mM     |
| <b>T<sub>2</sub></b>  | MR 30s                     | T <sub>12</sub> | WW 25%+ MR 30s+ GA<br>10mM | T <sub>22</sub> | WW 75%+ MR 0s +GA<br>10mM    |
| <b>T<sub>3</sub></b>  | GA 5mM + MR 0s             | T <sub>13</sub> | WW 50% + MR 0s             | T <sub>23</sub> | WW 75%+ MR 30s+ GA<br>5mM    |
| <b>T<sub>4</sub></b>  | GA10mM + MR 0s             | T <sub>14</sub> | WW 50%+MR 30s              | T <sub>24</sub> | WW 75%+ MR 30s + G.A<br>10mM |
| <b>T<sub>5</sub></b>  | MR 30s +GA 5mM             | T <sub>15</sub> | WW 50%+ MR 0s +GA<br>5mM   | T <sub>25</sub> | WW 100% + MR 0s              |
| <b>T<sub>6</sub></b>  | MR30s+GA 10mM              | T <sub>16</sub> | WW 50%+ MR 0s +GA<br>10mM  | T <sub>26</sub> | WW+ 100% +MR 30s             |
| <b>T<sub>7</sub></b>  | WW 25% + MR 0s             | T <sub>17</sub> | WW 50%+ MR 30s+ GA<br>5mM  | T <sub>27</sub> | WW 100%+ MR 0s +GA<br>5mM    |
| <b>T<sub>8</sub></b>  | WW 25% +MR 30s             | T <sub>18</sub> | WW 50%+ MR 30s+ GA<br>10mM | T <sub>28</sub> | WW 100%+ MR 0s +GA<br>10mM   |
| <b>T<sub>9</sub></b>  | WW 25% + MR 0s + GA<br>5mM | T <sub>19</sub> | WW 75% + MR 0s             | T <sub>29</sub> | WW 100%+ MR 30s+<br>G.A 5mM  |
| <b>T<sub>10</sub></b> | WW 25%+ MR 0s+ GA<br>10mM  | T <sub>20</sub> | WW 75%+MR 30s              | T <sub>30</sub> | WW 100%+ MR 30s+ GA<br>10mM  |

Ck= Control

WW= Wastewater

MR=Microwave Radiation

GA=Glutamic Acid

Supplementary Table S2: Physic-chemical characterization of surgical and textile industry wastewater

| Parameters                           | Surgical wastewater<br>Concentration | Textile wastewater<br>Concentration |
|--------------------------------------|--------------------------------------|-------------------------------------|
| Temperature (In Lab)                 | 24.6 °C                              | 27.4°C                              |
| PH value                             | 8.0                                  | 7.55                                |
| Conductivity                         | 3100 $\mu\text{S}/\text{cm}$         | 3254 $\mu\text{S}/\text{cm}$        |
| Total dissolved solids (TDS)         | 1727 mg/L                            | 2155.0 mg/L                         |
| Suplphate                            | 69 mg/L                              | 90 mg/L                             |
| Flouride                             | 11.4 mg/L                            | 13.4 mg/L                           |
| Total Chlorine                       | 1.6 mg/L                             | 1.9 mg/L                            |
| Cyanide                              | ND                                   | ND                                  |
| Total Hardness (As $\text{CaCO}_3$ ) | 364 mg/L                             | 387 mg/L                            |
| Chloride                             | 308 mg/L                             | 360 mg/L                            |
| Sulfide                              | 1.3 mg/L                             | 1.2 mg/L                            |
| Oil and Grease                       | 8.23 mg/L                            | 10.3 mg/L                           |
| Chemical Oxygen Demand (COD)         | 141 mg/L                             | 145 mg/L                            |
| Biochemical Oxygen Demand (BOD)      | 132 mg/L                             | 137 mg/L                            |
| Phenol Compounds                     | 0.2 mg/L                             | 0.2 mg/L                            |
| Total Suspended Solids               | 8132 mg/L                            | 8013 mg/L                           |
| Lead (Pb)                            | 1.9 mg/L                             | 2.6 mg/L                            |
| Copper (Cu)                          | 0.9 mg/L                             | 1.9 mg/L                            |
| Chromium (Cr)                        | 1.1 mg/L                             | 1.6 mg/L                            |
| Cadmium (Cd)                         | 2.2 mg/L                             | 2.9 mg/L                            |
| Arsenic (As)                         | 1.1 mg/L                             | 1.1 mg/L                            |
| Nickel (Ni)                          | 2.4 mg/L                             | 1.9 mg/L                            |
| Iron (Fe)                            | 1.28 mg/L                            | 1.0 mg/L                            |
| Zinc (Zn)                            | 0.12 mg/L                            | 0.18 mg/L                           |
| Manganese (Mn)                       | 0.9 mg/L                             | 0.10 mg/L                           |
| Mercury (Hg)                         | 0.9 mg/L                             | 0.13 mg/L                           |
| Boron (B)                            | 0.1 mg/L                             | 0.1 mg/L                            |
| Selenium (Se)                        | ND                                   | ND                                  |
| Chlorine (Cl)                        | ND                                   | ND                                  |
| Ammonia ( $\text{NH}_3$ )            | ND                                   | ND                                  |
